# Supplementary figures and images for: Injury incidence rates in women’s football: a systematic review and meta-analysis of prospective injury surveillance studies
Source: HighWire-hosted journal article supplement (doi:10.1136/bjsports-2021-105177), 2022-10-13

## Supplementary File 4.

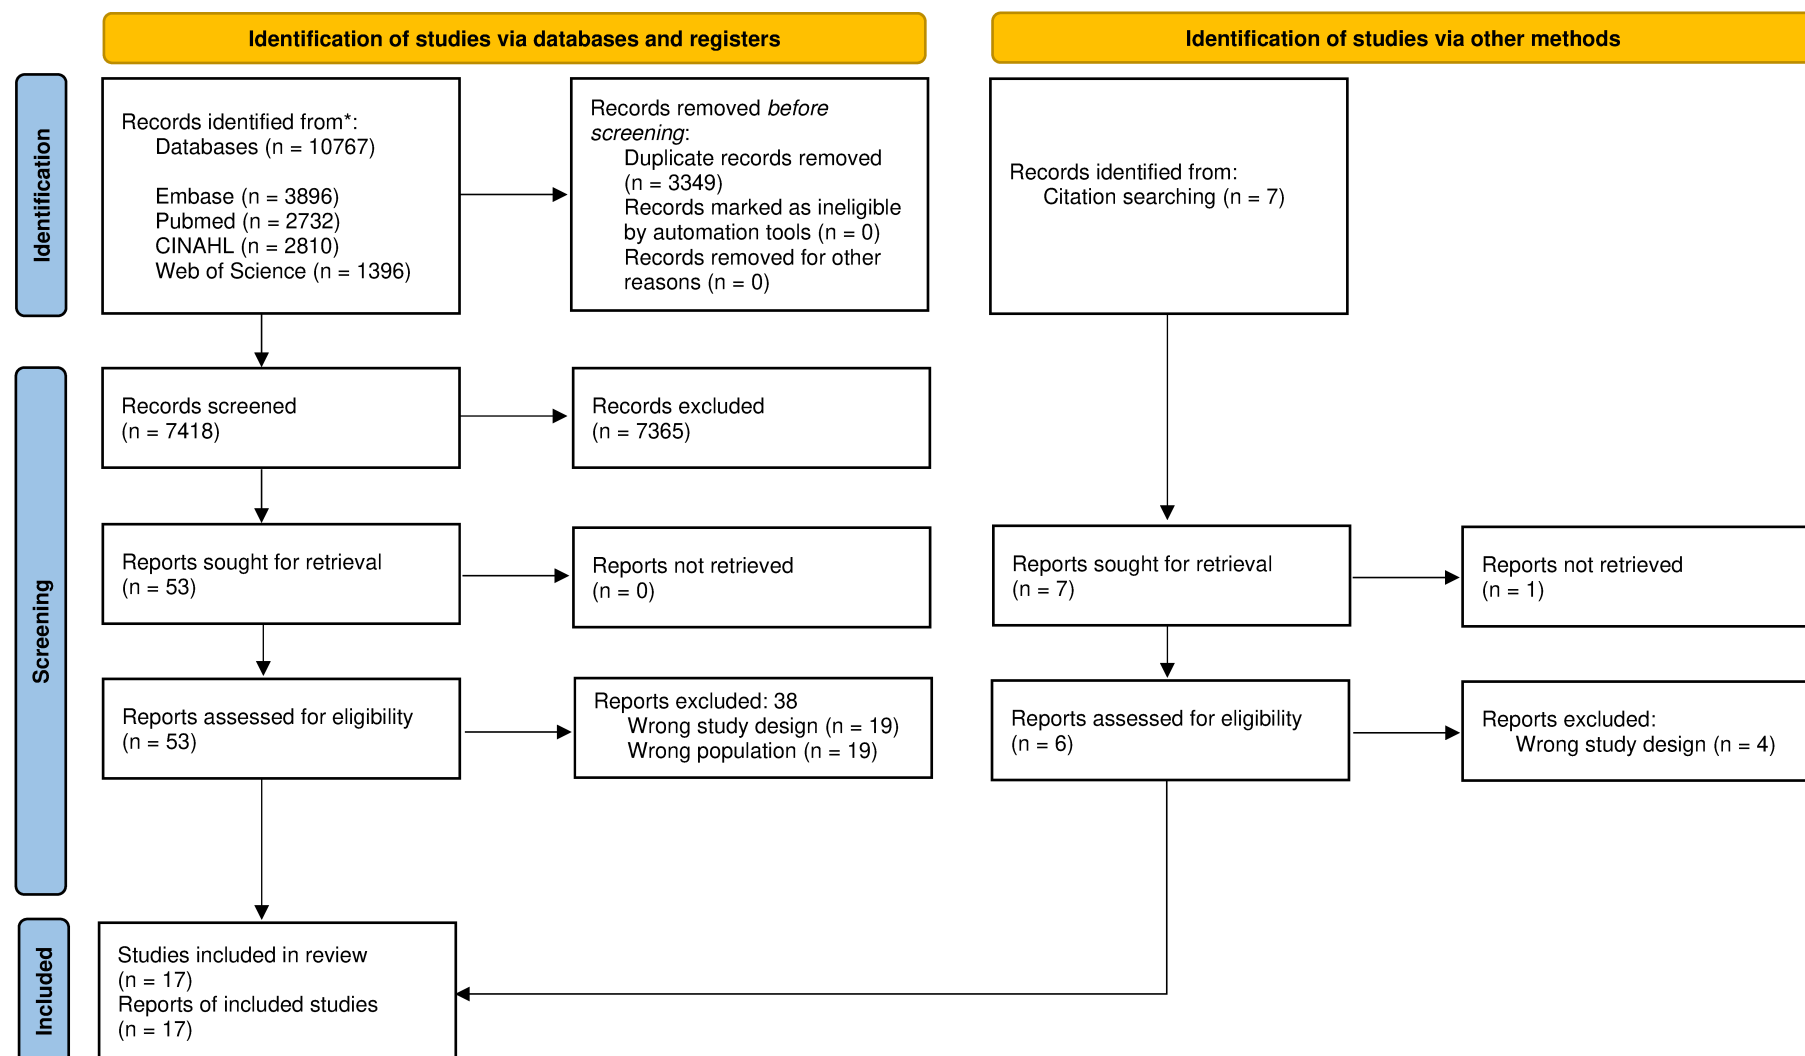

Supplement: bjsports-2021-105177supp004_data_supplement.pdf [file bjsports-2021-105177supp004_data_supplement.pdf]
